# Supplementary material for: External Validation Study of First Trimester Obstetric Prediction Models (Expect Study I): Research Protocol and Population Characteristics
Source: PubMed Central journal article supplement (PMC5680517; doi:10.2196/resprot.7837), 2017-10-26
Supplement: resprot_v6i10e203_app2.pdf [file resprot_v6i10e203_app2.pdf]

Table 1. Aspects covered by Pregnancy Questionnaire 1.

| Domain                                   | Item                             | Sub-items                                                                                                         |
|------------------------------------------|----------------------------------|-------------------------------------------------------------------------------------------------------------------|
| Sociodemographic characteristics         | Ethnicity                        | Country of birth                                                                                                  |
|                                          |                                  | Country of birth biological parents                                                                               |
|                                          |                                  | Ethnic origin                                                                                                     |
|                                          | Highest level of education       |                                                                                                                   |
|                                          | Work                             |                                                                                                                   |
|                                          | Volunteer work and informal care |                                                                                                                   |
| Living situation                         |                                  |                                                                                                                   |
| Anthropometric data                      | Height                           |                                                                                                                   |
|                                          | Pre-pregnancy weight             |                                                                                                                   |
| Medical conditions                       | Chronic hypertension             |                                                                                                                   |
|                                          | Cardiovascular disease           | Type                                                                                                              |
|                                          | Diabetes mellitus                | Type                                                                                                              |
|                                          | Thromboembolism                  |                                                                                                                   |
|                                          | Thyroid disease                  | Hypothyroidism<br>Hyperthyroidism                                                                                 |
|                                          | Kidney disease                   | Type                                                                                                              |
|                                          | Autoimmune diseases              | Systemic lupus erythematosus<br>Antiphospholipid syndrome                                                         |
|                                          | Lung diseases                    | Type                                                                                                              |
|                                          | Gynaecologic history             | Uterus anomaly                                                                                                    |
|                                          |                                  | Cervical surgery                                                                                                  |
| Obstetric history                        | Parity                           |                                                                                                                   |
|                                          | Miscarriage                      | Date                                                                                                              |
|                                          |                                  | Gestational age                                                                                                   |
|                                          | Termination                      | Date                                                                                                              |
|                                          |                                  | Gestational age                                                                                                   |
|                                          |                                  | Indication                                                                                                        |
|                                          | Ectopic pregnancy                | Date                                                                                                              |
|                                          |                                  | Gestational age                                                                                                   |
|                                          | Multiple birth                   |                                                                                                                   |
|                                          | Pregnancy outcomes               | Pre-eclampsia<br>HELLP syndrome<br>Gestational diabetes mellitus<br>Preterm birth<br>Placental abruption<br>Other |
|                                          |                                  | Management                                                                                                        |
|                                          | Labour and delivery              | Mode of delivery                                                                                                  |
|                                          |                                  | Hospital/home delivery                                                                                            |
|                                          | Neonatal outcomes                | Gender                                                                                                            |
|                                          |                                  | Birth weight                                                                                                      |
| Fetal mortality (antenatal, intrapartum) |                                  |                                                                                                                   |
| Neonatal mortality                       |                                  |                                                                                                                   |
| Lifestyle                                | Smoking                          | Status                                                                                                            |
|                                          |                                  | Quantity                                                                                                          |
|                                          | Alcohol                          | Status                                                                                                            |

|                                                                        |                                                                                                                                                                                                                                                                                                              |                                                                                                                                          |
|------------------------------------------------------------------------|--------------------------------------------------------------------------------------------------------------------------------------------------------------------------------------------------------------------------------------------------------------------------------------------------------------|------------------------------------------------------------------------------------------------------------------------------------------|
|                                                                        |                                                                                                                                                                                                                                                                                                              | Quantity                                                                                                                                 |
|                                                                        | Drugs                                                                                                                                                                                                                                                                                                        | Status                                                                                                                                   |
|                                                                        |                                                                                                                                                                                                                                                                                                              | Type(s)                                                                                                                                  |
|                                                                        |                                                                                                                                                                                                                                                                                                              | Frequency                                                                                                                                |
| Medication                                                             | Name                                                                                                                                                                                                                                                                                                         | Dose                                                                                                                                     |
|                                                                        |                                                                                                                                                                                                                                                                                                              | Frequency                                                                                                                                |
|                                                                        |                                                                                                                                                                                                                                                                                                              | Duration                                                                                                                                 |
| Vitamin and mineral supplements                                        | Folic acid                                                                                                                                                                                                                                                                                                   | Brand name                                                                                                                               |
|                                                                        | Prenatal vitamins                                                                                                                                                                                                                                                                                            | Duration                                                                                                                                 |
|                                                                        | General multivitamins                                                                                                                                                                                                                                                                                        | Dose                                                                                                                                     |
|                                                                        | Vitamin D                                                                                                                                                                                                                                                                                                    | Frequency                                                                                                                                |
|                                                                        | Calcium                                                                                                                                                                                                                                                                                                      |                                                                                                                                          |
|                                                                        | Iron                                                                                                                                                                                                                                                                                                         |                                                                                                                                          |
| Dietary intake                                                         | Fruit intake                                                                                                                                                                                                                                                                                                 |                                                                                                                                          |
|                                                                        | Selected items from Food Frequency Questionnaire tool:<br>Milk and buttermilk<br>Yoghurt and fromage frais<br>Yoghurt drinks and other dairy beverages<br>Chocolate milk<br>Custard and pudding<br>Dutch cheese<br>Non-Dutch cheese and cream cheese<br>Cheese spread<br>Bread spread<br>Cooking fat<br>Fish | Frequency                                                                                                                                |
|                                                                        |                                                                                                                                                                                                                                                                                                              | Average daily amount                                                                                                                     |
| Sun exposure                                                           | Skin type                                                                                                                                                                                                                                                                                                    |                                                                                                                                          |
|                                                                        | Sun exposure                                                                                                                                                                                                                                                                                                 | Week days                                                                                                                                |
|                                                                        |                                                                                                                                                                                                                                                                                                              | Weekend                                                                                                                                  |
|                                                                        |                                                                                                                                                                                                                                                                                                              | Skin exposure                                                                                                                            |
|                                                                        |                                                                                                                                                                                                                                                                                                              | Sunscreen use                                                                                                                            |
|                                                                        | Solarium                                                                                                                                                                                                                                                                                                     |                                                                                                                                          |
| Family history medical conditions (grandparents, parents and siblings) | Hypertension                                                                                                                                                                                                                                                                                                 |                                                                                                                                          |
|                                                                        | Heart disease                                                                                                                                                                                                                                                                                                |                                                                                                                                          |
|                                                                        | Diabetes mellitus                                                                                                                                                                                                                                                                                            | Type                                                                                                                                     |
| Family history obstetric outcomes                                      | Adverse obstetric outcomes (mother and sister(s))                                                                                                                                                                                                                                                            | Pre-eclampsia<br>HELLP syndrome<br>Gestational diabetes mellitus<br>Preterm birth<br>Low birth weight infant<br>High birth weight infant |
|                                                                        | Women's birth weight                                                                                                                                                                                                                                                                                         |                                                                                                                                          |
|                                                                        | Women's gestation at delivery                                                                                                                                                                                                                                                                                |                                                                                                                                          |
| Mental health                                                          | Mental disorder                                                                                                                                                                                                                                                                                              | Type                                                                                                                                     |
|                                                                        |                                                                                                                                                                                                                                                                                                              | Treatment                                                                                                                                |
|                                                                        | Edinburgh Depression Scale                                                                                                                                                                                                                                                                                   | 10-items                                                                                                                                 |

|                            |                                         |                       |
|----------------------------|-----------------------------------------|-----------------------|
| Health status              | EuroQol-5D-3L                           | Mobility              |
|                            |                                         | Self-care             |
|                            |                                         | Usual activities      |
|                            |                                         | Pain/discomfort       |
|                            |                                         | Anxiety/depression    |
|                            | Cognitive dimension                     |                       |
|                            | Evaluation overall health status        | Visual analogue scale |
| Current pregnancy          | Due date                                |                       |
|                            | Conception                              | Method of conception  |
|                            |                                         | Time to conception    |
|                            | Caregiver (primary care/secondary care) |                       |
|                            | Multiple pregnancy                      |                       |
| Vaginal bleeding           | Duration                                |                       |
|                            | Quantity                                |                       |
| Blood pressure measurement | Systolic and diastolic blood pressure   | Measurement           |
|                            |                                         | Date of measurement   |
| Heart rate measurement     | Heart rate                              | Measurement           |
|                            |                                         | Date of measurement   |

Table 2. Aspects covered by Postpartum Questionnaire 1.

| Domain                         | Item                             | Sub-items                              |
|--------------------------------|----------------------------------|----------------------------------------|
| Pregnancy outcome              | Miscarriage                      | Gestational age                        |
|                                | Termination                      | Gestational age                        |
|                                |                                  | Indication                             |
|                                | Ectopic pregnancy                | Gestational age                        |
| Delivery                       |                                  |                                        |
| Pregnancy complications        | Pregnancy induced hypertension   | Gestational age                        |
|                                |                                  | Treatment                              |
|                                | Pre-eclampsia                    | Gestational age                        |
|                                |                                  | Treatment                              |
|                                |                                  | HELLP syndrome                         |
|                                | Gestational diabetes mellitus    | Gestational age                        |
|                                |                                  | Treatment                              |
|                                | Threatened preterm labour        | Preterm premature rupture of membranes |
|                                |                                  | Admission                              |
|                                |                                  | Treatment                              |
| Growth disorders               | Small-for-gestational-age infant |                                        |
|                                | Low-for-gestational-age infant   |                                        |
|                                | Gestational age                  |                                        |
| Labour and delivery            | Date                             |                                        |
|                                | Gestational age                  |                                        |
|                                | Hospital/home birth              |                                        |
|                                | Primary/secondary/tertiary care  | Referral (indication)                  |
|                                | Mode of delivery                 |                                        |
|                                | Assisted birth                   |                                        |
| Neonatal outcomes              | Multiple birth                   |                                        |
|                                | Gender                           |                                        |
|                                | Birth weight                     |                                        |
|                                | Mortality                        | Antenatal                              |
|                                |                                  | Intrapartum                            |
|                                |                                  | Postpartum within 24 hours             |
|                                |                                  | Postpartum $\geq 24$ hours             |
|                                | Admission                        | Indication                             |
|                                |                                  | Duration                               |
|                                |                                  | Neonatal intensive care unit           |
| Congenital anomalies           |                                  |                                        |
| Child's growth                 | Weight                           |                                        |
|                                | Date measurement                 |                                        |
| Biological father              | Ethnicity                        | Country of birth                       |
|                                |                                  | Country of birth biological parents    |
|                                |                                  | Ethnic origin                          |
|                                | Anthropometric data              | Length                                 |
|                                |                                  | Weight                                 |
|                                | Father's birth weight            |                                        |
| Father's gestation at delivery |                                  |                                        |

Table 3. Aspects covered by Pregnancy Questionnaires 2, and 3 and Postpartum Questionnaire 2.

| Domain                                                                     | Item                                                                           | Sub-items                                                                                                                                                              |
|----------------------------------------------------------------------------|--------------------------------------------------------------------------------|------------------------------------------------------------------------------------------------------------------------------------------------------------------------|
| Pregnancy status (pregnancy questionnaire 2 and 3)                         | Pregnant                                                                       | Gestational age                                                                                                                                                        |
|                                                                            | Miscarriage                                                                    | Gestational age                                                                                                                                                        |
|                                                                            | Termination                                                                    | Gestational age                                                                                                                                                        |
|                                                                            |                                                                                | Indication                                                                                                                                                             |
|                                                                            | Ectopic pregnancy                                                              | Gestational age                                                                                                                                                        |
| Gave birth                                                                 | Date                                                                           |                                                                                                                                                                        |
|                                                                            | Referral to postpartum questionnaire 1 and 2                                   |                                                                                                                                                                        |
| Maternal health status                                                     | EuroQol-5D-3L                                                                  | Mobility                                                                                                                                                               |
|                                                                            |                                                                                | Self-care                                                                                                                                                              |
|                                                                            |                                                                                | Usual activities                                                                                                                                                       |
|                                                                            |                                                                                | Pain/discomfort                                                                                                                                                        |
|                                                                            |                                                                                | Anxiety/depression                                                                                                                                                     |
|                                                                            | Cognitive dimension                                                            |                                                                                                                                                                        |
|                                                                            | Evaluation overall health status                                               | Visual analogue scale                                                                                                                                                  |
| Patient satisfaction                                                       | Patient Satisfaction Questionnaire Short Form (PSQ-18)                         | 18-items capturing the most important characteristics of services and providers that might influence patient satisfaction with care (pregnancy questionnaire 2 and 3). |
|                                                                            | Pregnancy and Childbirth Questionnaire (PCQ)                                   | Quality of care during pregnancy and delivery as perceived by woman who recently gave birth (postpartum questionnaire 2).                                              |
|                                                                            | Primary/secondary care                                                         | Referral                                                                                                                                                               |
|                                                                            |                                                                                | Information                                                                                                                                                            |
|                                                                            |                                                                                | Collaboration                                                                                                                                                          |
|                                                                            | Appointments (pregnancy questionnaire 2 and 3)                                 |                                                                                                                                                                        |
|                                                                            | Information (pregnancy questionnaire 2 and 3)                                  | Health                                                                                                                                                                 |
|                                                                            |                                                                                | Medical examination(s)                                                                                                                                                 |
|                                                                            |                                                                                | Treatment(s)                                                                                                                                                           |
|                                                                            | Intended place of birth (postpartum questionnaire 2)                           |                                                                                                                                                                        |
| Overall grade care during pregnancy (pregnancy questionnaire 2 and 3)      |                                                                                |                                                                                                                                                                        |
| Overall grade care during labour and delivery (postpartum questionnaire 2) |                                                                                |                                                                                                                                                                        |
| Anxiety                                                                    | State anxiety of the State-Trait Anxiety Inventory (pregnancy questionnaire 2) | 20-items                                                                                                                                                               |
|                                                                            | Concerns                                                                       |                                                                                                                                                                        |
| Costs of current pregnancy –                                               | General practitioner                                                           | Consultation(s) (type and                                                                                                                                              |

|                                                                                                                |                                                     |                    |
|----------------------------------------------------------------------------------------------------------------|-----------------------------------------------------|--------------------|
| care for pregnant woman and their newborn(s) from the beginning of pregnancy up to ±6 weeks after the due date | Emergency department                                | frequency)         |
|                                                                                                                | Midwifery care                                      |                    |
|                                                                                                                | Obstetrician                                        |                    |
|                                                                                                                | Other medical specialist(s)                         |                    |
|                                                                                                                | Other caregivers (e.g. dietician, physiotherapist)  |                    |
|                                                                                                                | Home care (domestic help and nursing)               |                    |
|                                                                                                                | Well-baby clinic (postpartum questionnaire 2)       |                    |
|                                                                                                                | Fetal ultrasound(s)                                 | Type and frequency |
|                                                                                                                | Admission(s)                                        | Indication         |
|                                                                                                                |                                                     | Duration           |
|                                                                                                                |                                                     | Department         |
|                                                                                                                | Maternity care (postpartum questionnaire 2)         | Duration           |
|                                                                                                                | Medication                                          | Name               |
|                                                                                                                |                                                     | Dose               |
|                                                                                                                |                                                     | Duration           |
|                                                                                                                |                                                     | Frequency          |
|                                                                                                                | Over-the-counter medicines and vitamins/supplements | Name               |
| Duration                                                                                                       |                                                     |                    |
| Frequency                                                                                                      |                                                     |                    |
| Cost                                                                                                           |                                                     |                    |
| Medical aid                                                                                                    | Type                                                |                    |
|                                                                                                                | Cost                                                |                    |

Table 4. Data extracted from medical records and letters of discharge.

| Domain                             | Item                                            | Sub-items          |
|------------------------------------|-------------------------------------------------|--------------------|
| Obstetric history                  | Gravidity                                       |                    |
|                                    | Parity                                          |                    |
| Caregiver                          | Primary/secondary/tertiary care                 |                    |
|                                    | Referral                                        | Date<br>Indication |
| Current pregnancy                  | Due date                                        |                    |
|                                    | Pregnancy outcome                               | Miscarriage        |
|                                    |                                                 | Termination        |
|                                    |                                                 | Ectopic pregnancy  |
|                                    |                                                 | Gave birth         |
|                                    | Method of conception                            |                    |
|                                    | Medical indication secondary care/tertiary care |                    |
|                                    | Admission                                       | Date               |
|                                    |                                                 | Indication         |
|                                    | Highest diastolic blood pressure                |                    |
|                                    | Proteinuria                                     |                    |
| Complication (letter of discharge) | Hypertensive disorder                           |                    |
|                                    | Gestational diabetes mellitus                   |                    |
| Labour and delivery                | Onset of labour                                 |                    |
|                                    | Mode of delivery                                |                    |
|                                    | Assisted birth                                  |                    |
|                                    | Hospital/home delivery                          |                    |
|                                    | Pain medication                                 |                    |
|                                    | Birth placenta                                  |                    |
|                                    | Amount of blood loss                            |                    |
|                                    | Admission                                       | Indication         |
| Duration                           |                                                 |                    |
| Neonatal outcomes                  | Gestational age                                 |                    |
|                                    | Gender                                          |                    |
|                                    | Birth weight                                    |                    |
|                                    | Apgar score 1, 5, and 10 minutes                |                    |
|                                    | pH umbilical cord                               | Arterial           |
|                                    |                                                 | Venous             |
|                                    | Congenital anomalies                            |                    |
|                                    | Paediatric consultation                         |                    |
|                                    | Admission                                       | Department         |
| Mortality                          | Date                                            |                    |
